# Supplementary material for: Effects of the COVID-19 pandemic on self-reported 12-month pneumococcal vaccination series completion rates in Canada: An interrupted time-series analysis
Source: bioRxiv or medRxiv preprint supplement (doi:10.1101/2022.06.21.22276720), 2022-06-22

Series: diff(diff(completion.csv, 12))

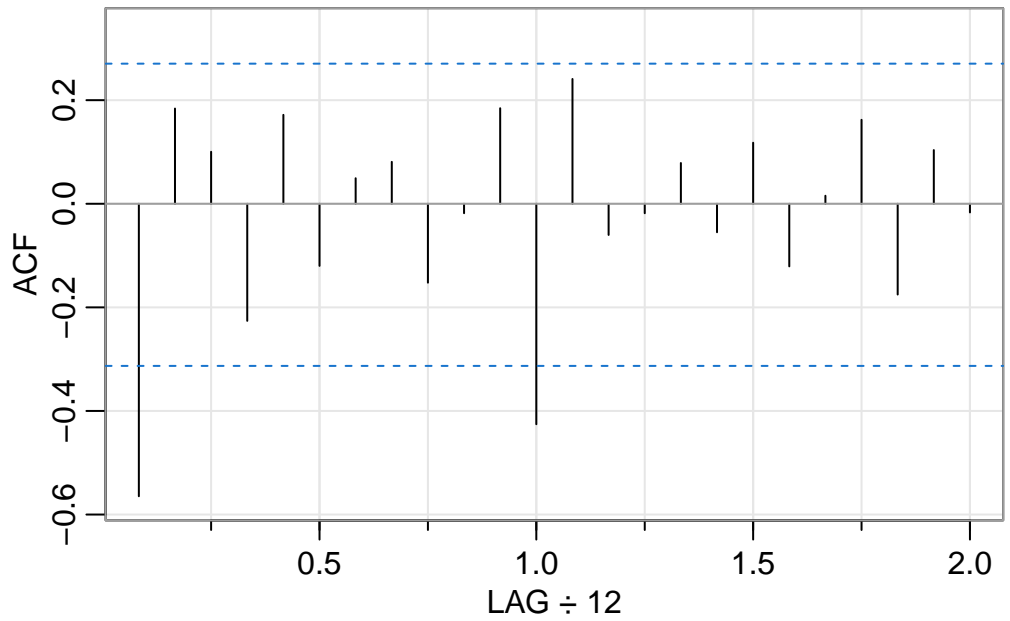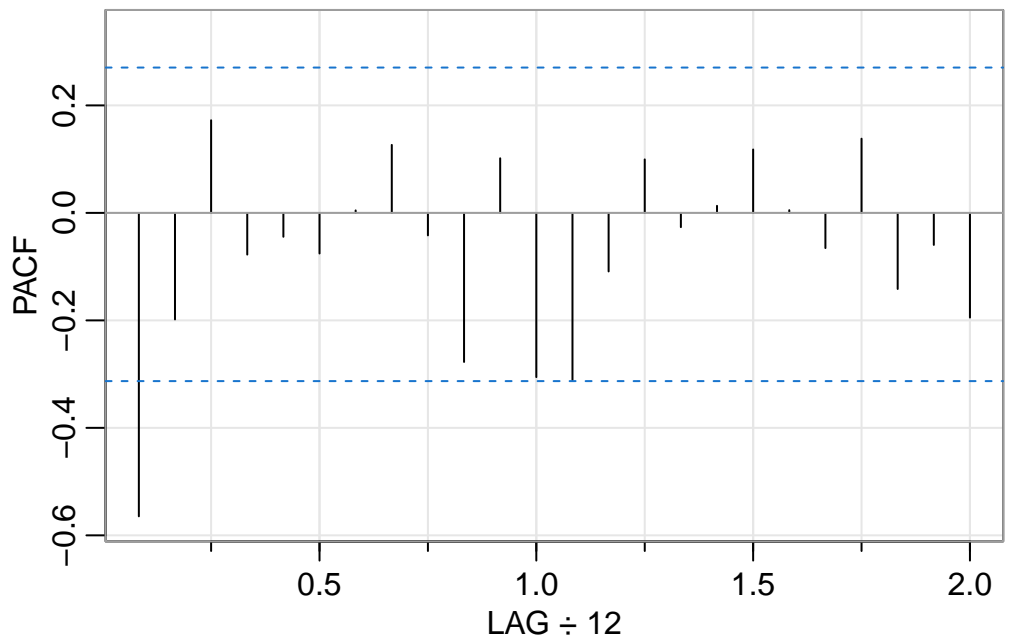

Series: diff(diff(enrollment.ts, 12))

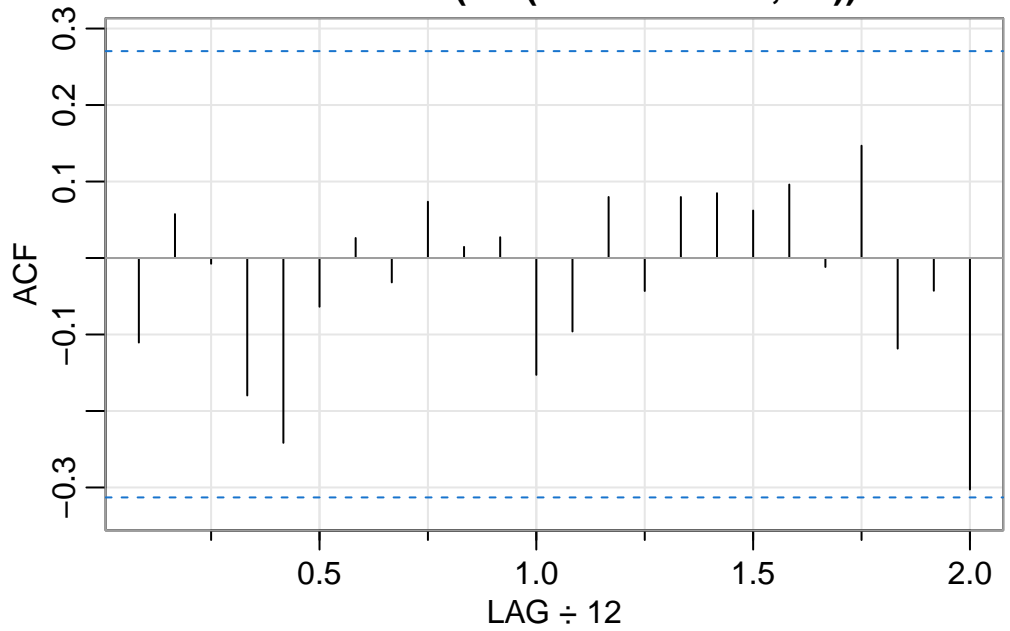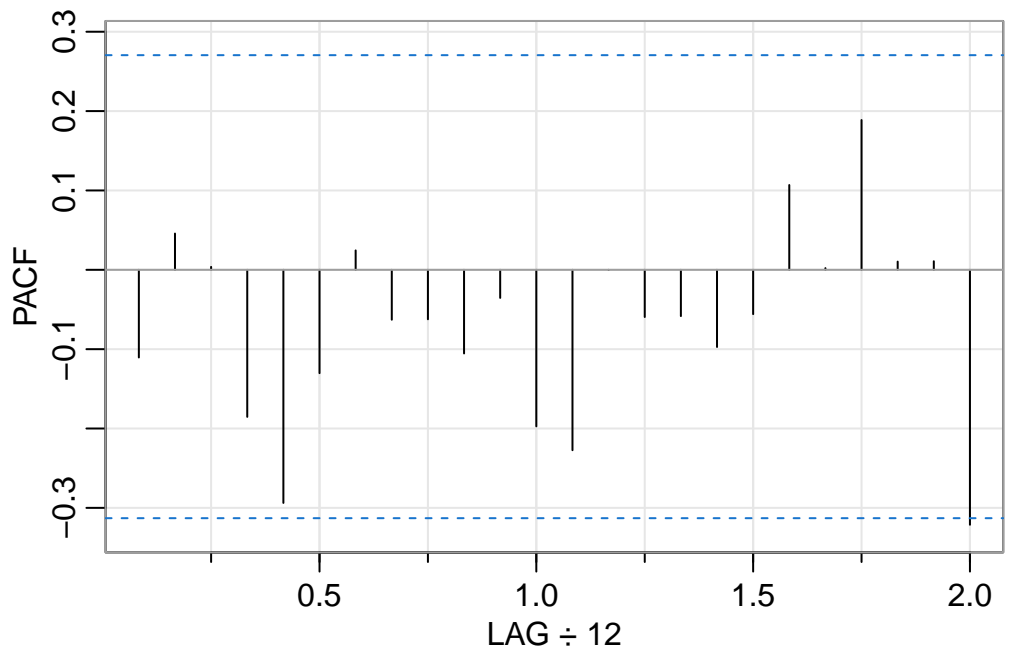

# Residuals from Regression with ARIMA(3,0,0)(1,1,0)[12] error

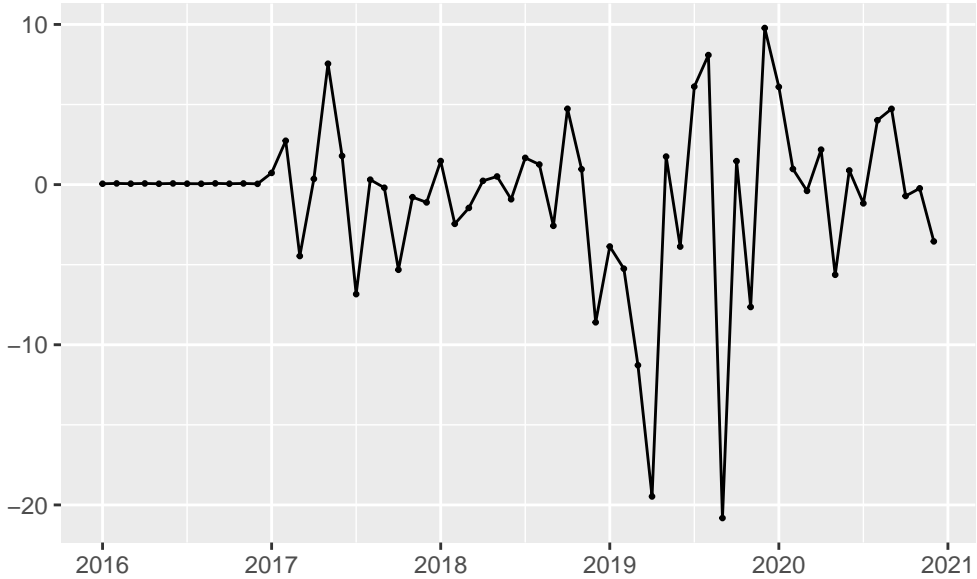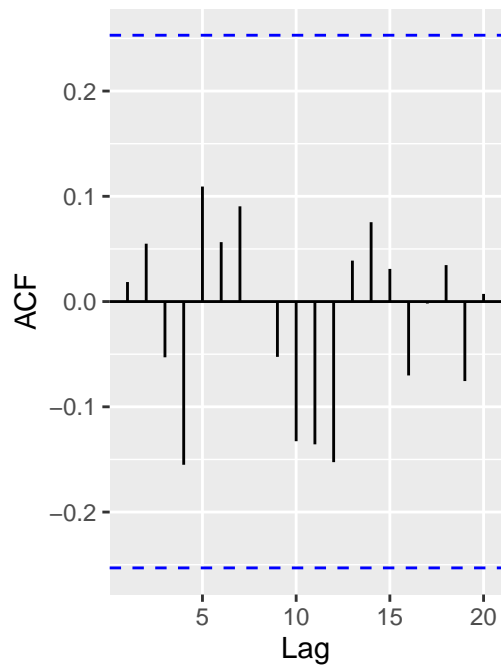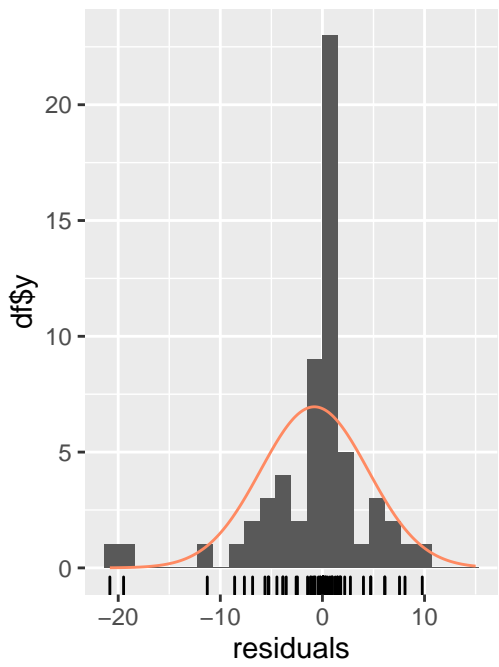

# Residuals from Regression with ARIMA(0,1,1)(0,0,1)[12] err

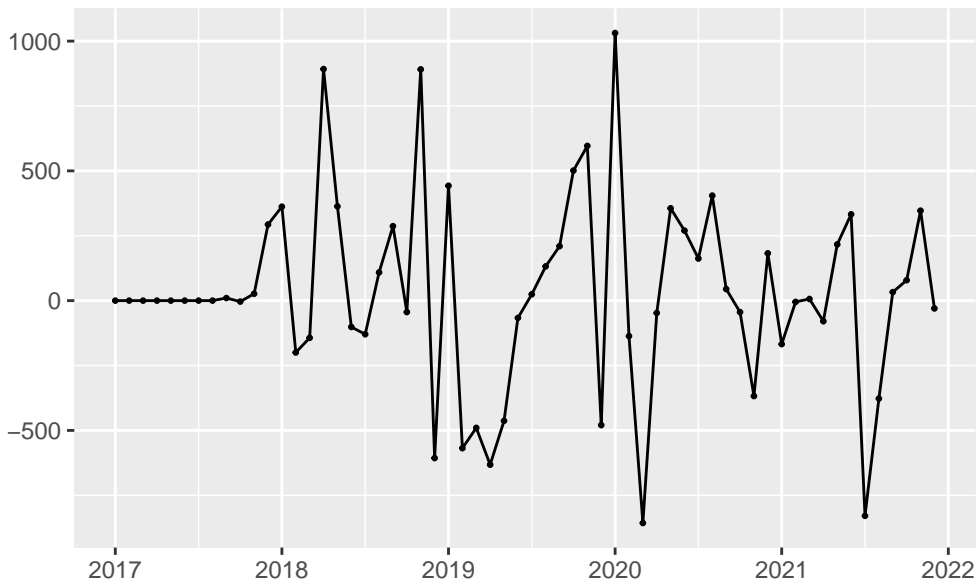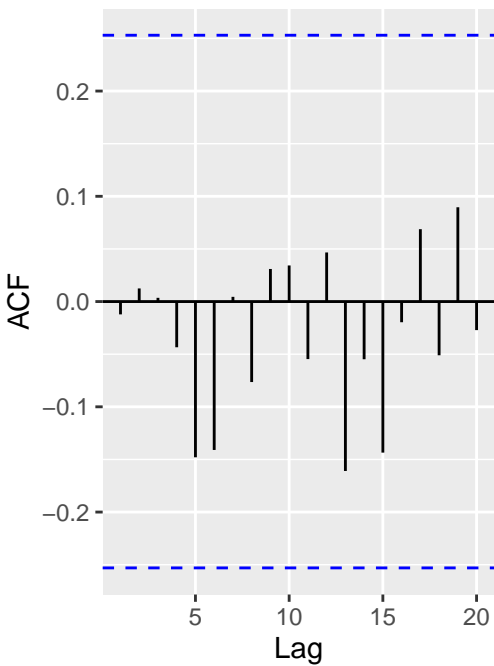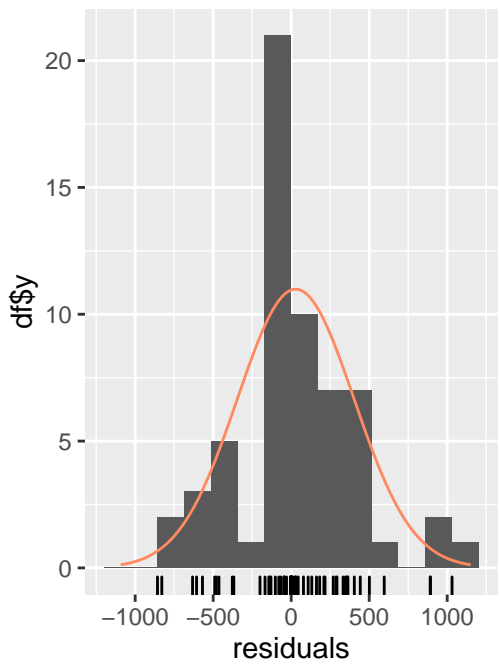

Supplement: Supplementary file [file media-1.pdf]
